# Supplementary material
Source: Copernicus journal article supplement (doi:10.5194/egusphere-2026-1428)
Supplement: Supplementary file 1 [file egusphere-2026-1428-supplement.pdf]

1 *Atmospheric Chemistry and Physics*

2 Supporting Information for

3 **Chemical Characterization and Source Apportionment of Carbonaceous Aerosols during**  
4 **Post-Monsoon Biomass Burning and Diwali at an Upwind Site of Delhi**

5 **Vasu Singh<sup>1</sup>, Dilip Ganguly<sup>1</sup>, Jaswant Rathore<sup>1</sup>, Lokesh Kumar Sahu<sup>2</sup>, Ravi K. Kunchala<sup>1</sup>, Sagnik**  
6 **Dey<sup>1</sup>**

7 <sup>1</sup>Centre for Atmospheric Sciences, Indian Institute of Technology Delhi, New Delhi, India,

8 <sup>2</sup>Space and Atmospheric Sciences Division, Physical Research Laboratory, Ahmedabad, India

9 Corresponding Author: Vasu Singh ([Vasu.Singh@cas.iitd.ac.in](mailto:Vasu.Singh@cas.iitd.ac.in), [vasu.singh.iitd@gmail.com](mailto:vasu.singh.iitd@gmail.com) )

10  
11  
12  
13 **Contents of this file**

14  
15 This supporting information contains 14 additional Figures (S1-S14) and 4 Tables (S1-S5) in 18  
16 pages.  
17

18  
19

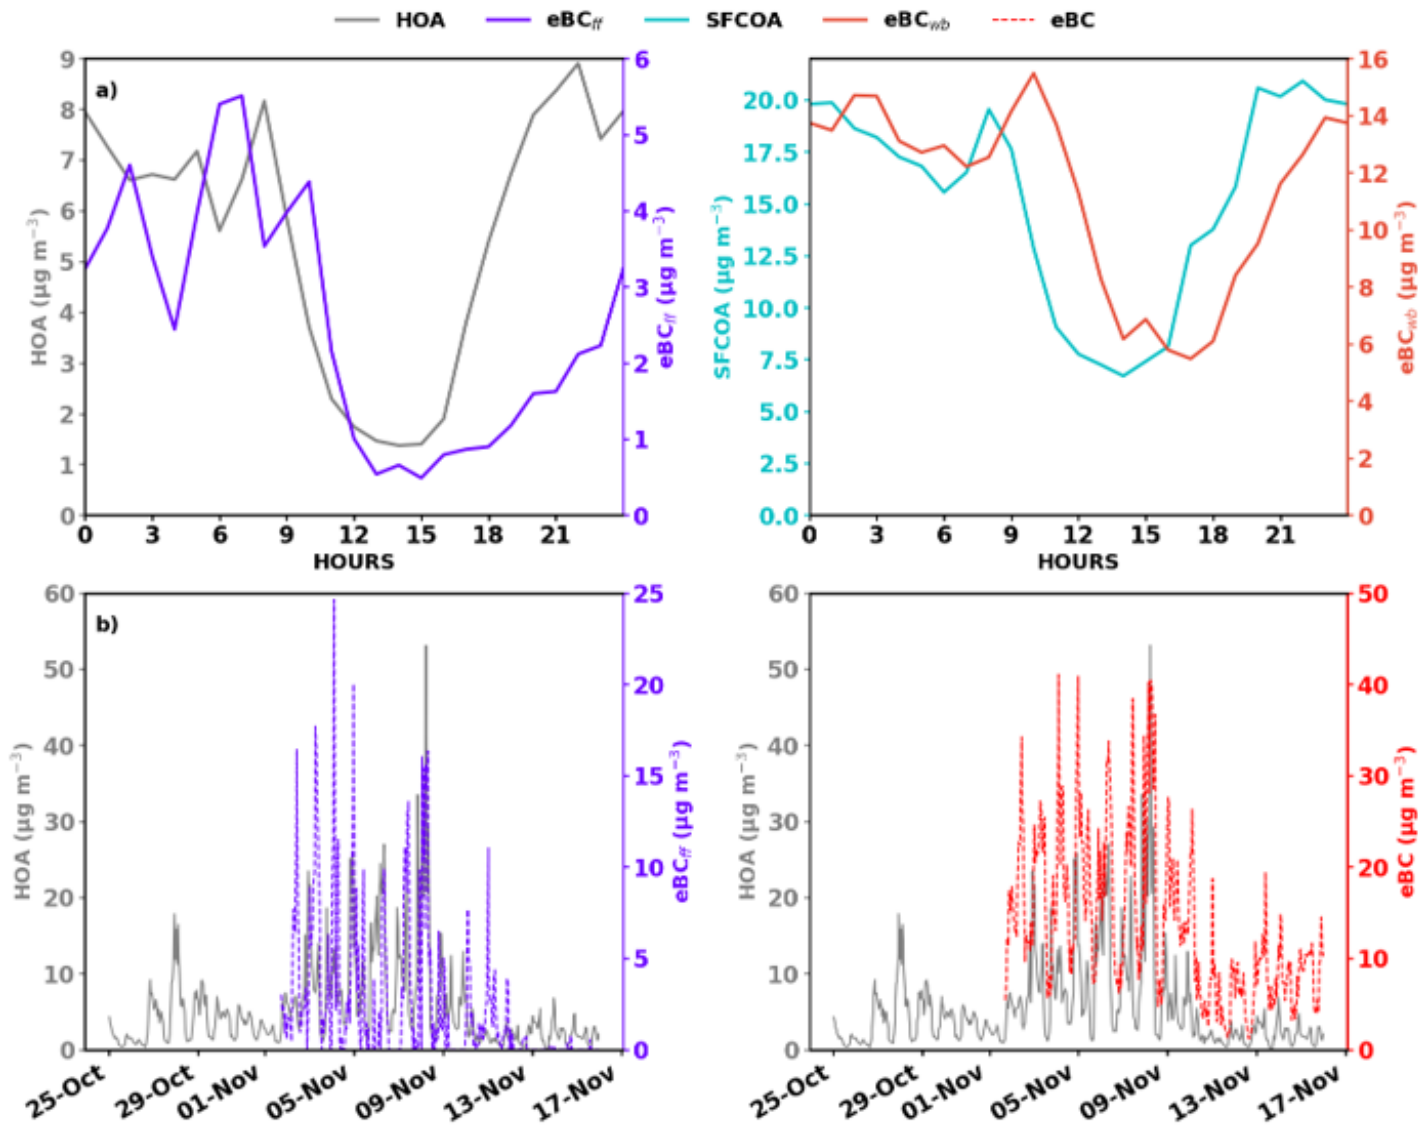

20 **Figure S1:** a) Mean diurnal mass concentrations for the Biomass Burning period. Additionally, the  
21 diurnal profiles of eBC<sub>ff</sub>, eBC<sub>wb</sub> (from source apportionment of AE31 data) are shown with the  
22 corresponding ACSM factors. b) Temporal trends of HOA with eBC and eBC<sub>ff</sub>.

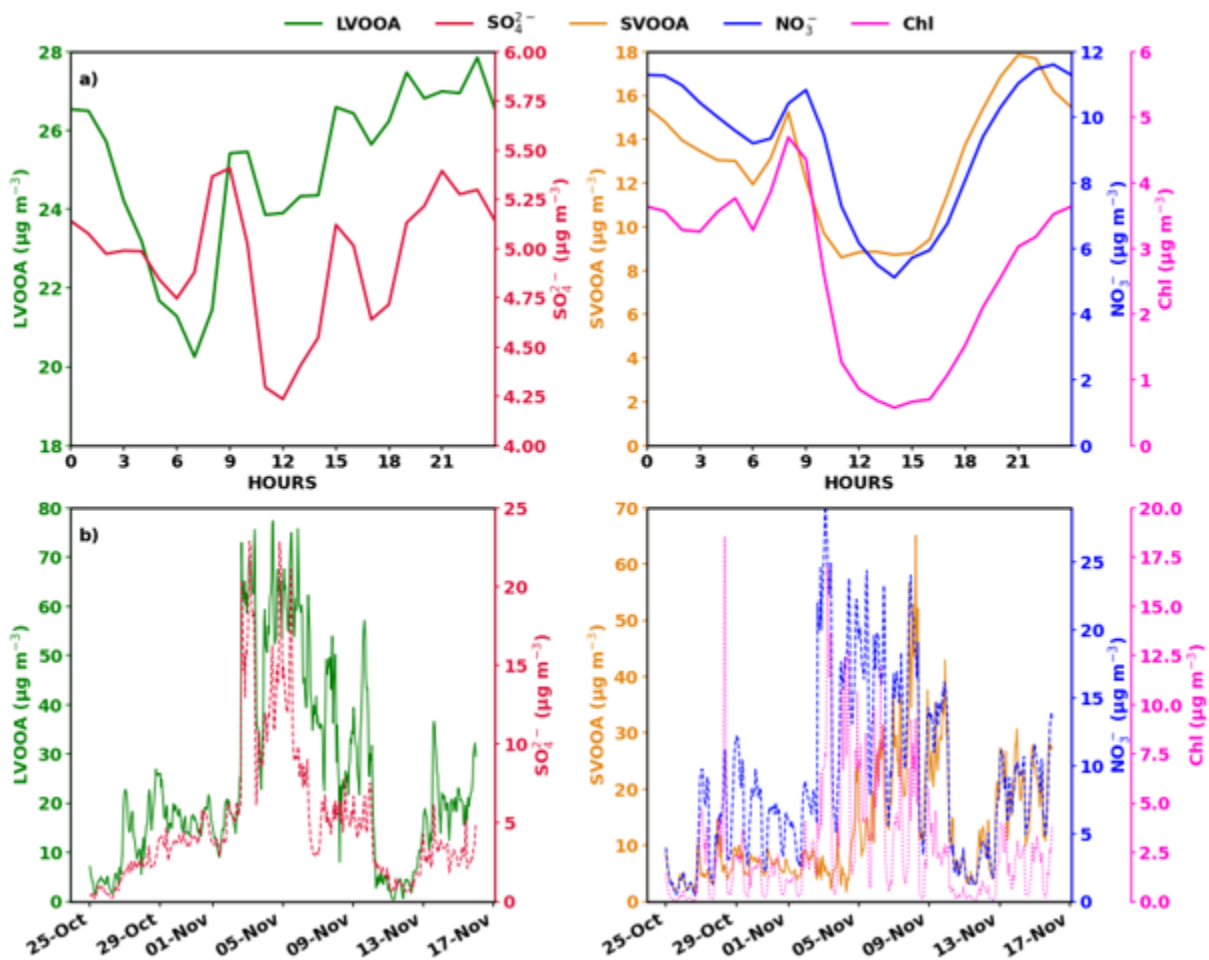

23  
 24 **Figure S2:** a) Mean diurnal mass concentrations for the Biomass Burning period. Additionally, the  
 25 diurnal profiles of  $\text{SO}_4^{2-}$ ,  $\text{NO}_3^-$  and  $\text{Chl}^-$  are shown with the corresponding ACSM factors. b)  
 26 Temporal trends of factors SVOOA and LVOOA with  $\text{SO}_4^{2-}$ ,  $\text{NO}_3^-$  and  $\text{Chl}^-$ .

**Correlation Matrix of Aerosol Species, Trace Gases, Meteorological and Radiation Parameters**

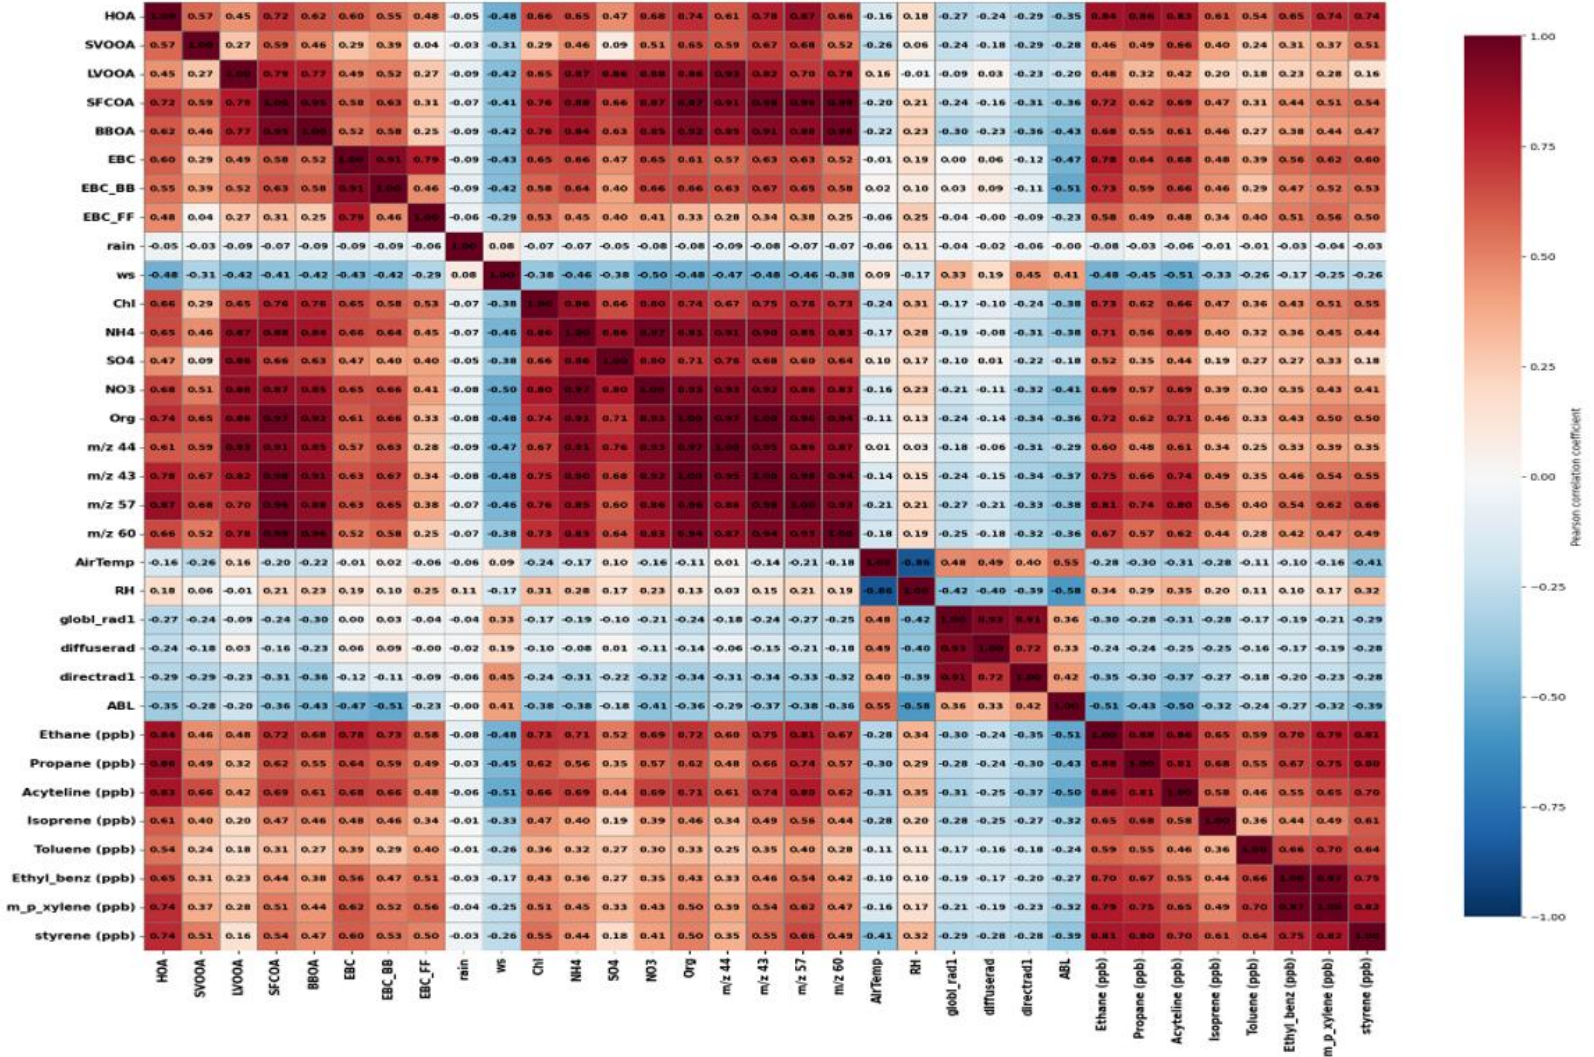

27

28 **Figure S3:** Correlation (Pearson R) of PMF factors: HOA, SVOOA, LVOOA, SFCOA and BBOA with  
 29 PM<sub>2.5</sub> species, gases and meteorology for data acquired from 25<sup>th</sup> October 2023 to 15<sup>th</sup> November  
 30 2023.

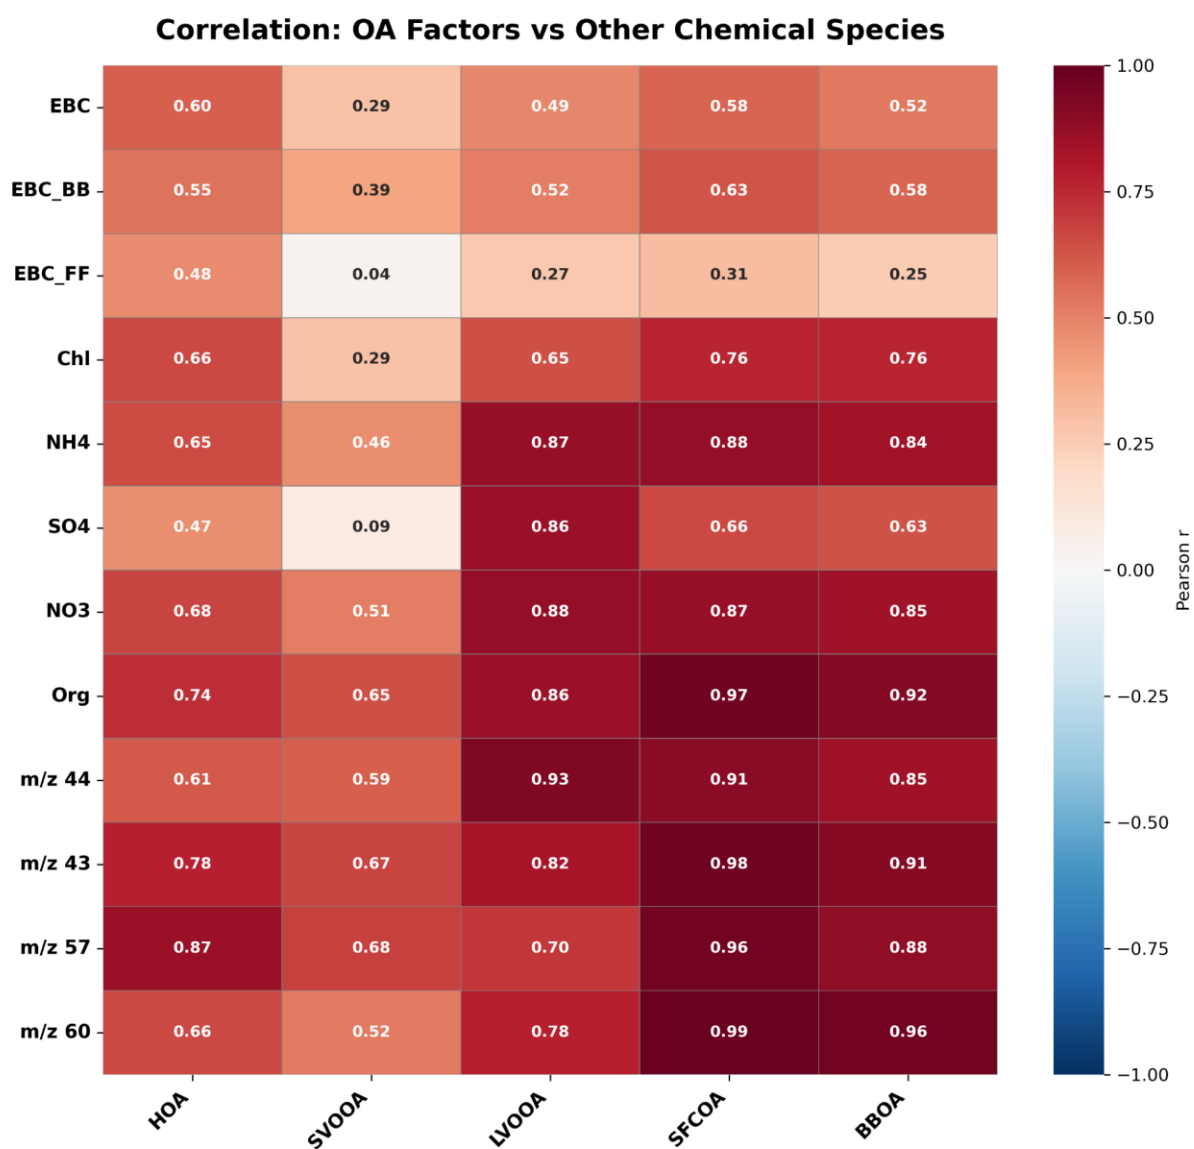

31  
 32 **Figure S4:** Pearson correlation heatmap between organic aerosol (OA) factors (HOA, SVOOA,  
 33 LVOOA, SFCOA, BBOA) and other chemical species, including black carbon components,  
 34 inorganic ions, bulk organics, and ACSM marker fragments. Colors represent the strength and  
 35 direction of correlations.

**Correlation: Aerosol Factors vs Meteorology**

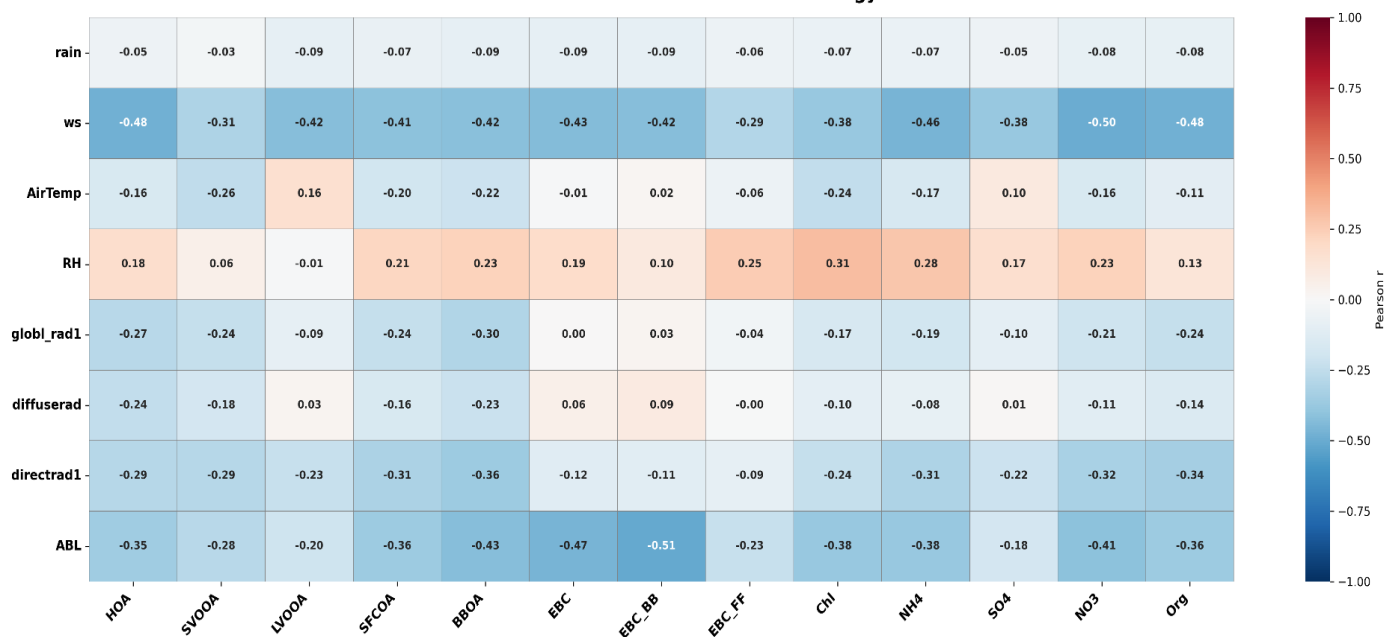

36  
 37 **Figure S5:** Pearson correlation heatmap between aerosol factors (OA components, BC, and major  
 38 inorganic species) and meteorological and radiative parameters. Positive and negative  
 39 correlations indicate the influence of atmospheric dynamics and boundary-layer processes on  
 40 aerosol variability.  
 41

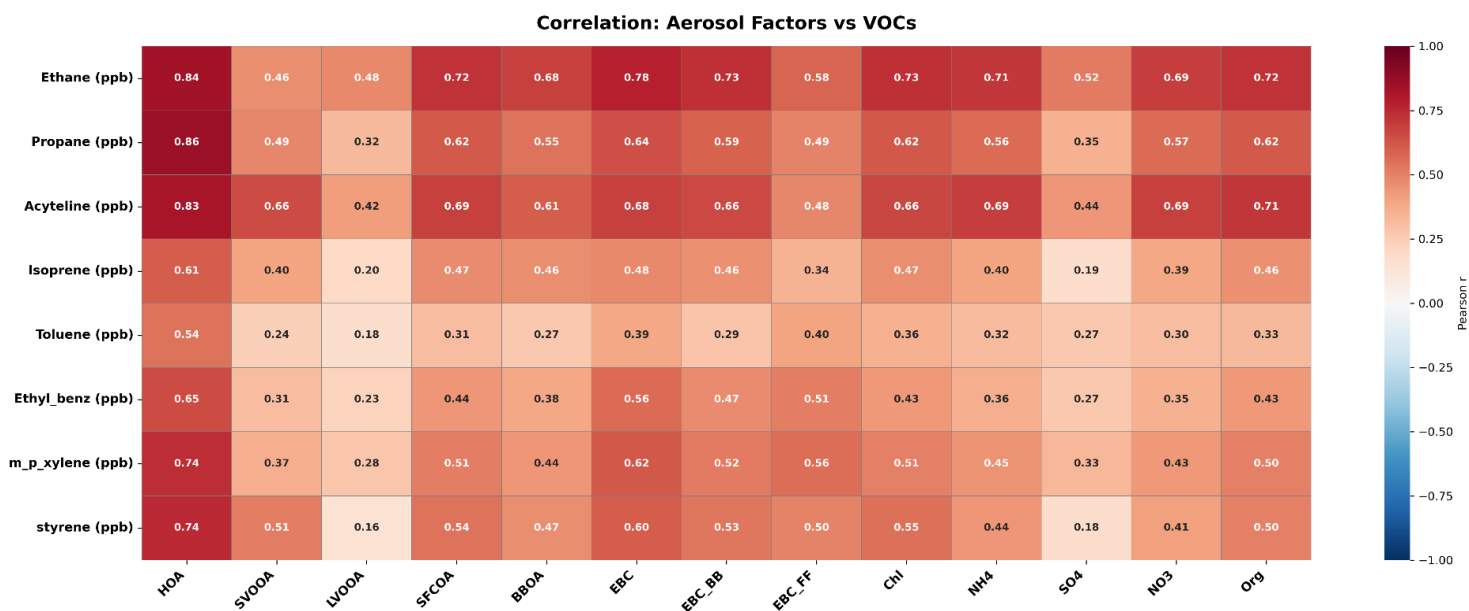

42

43 **Figure S6:** Pearson correlation heatmap between aerosol factors (OA components, BC, and  
 44 inorganic species) and measured volatile organic compounds (VOCs). Correlation patterns  
 45 highlight potential source linkages and secondary formation pathways.

46

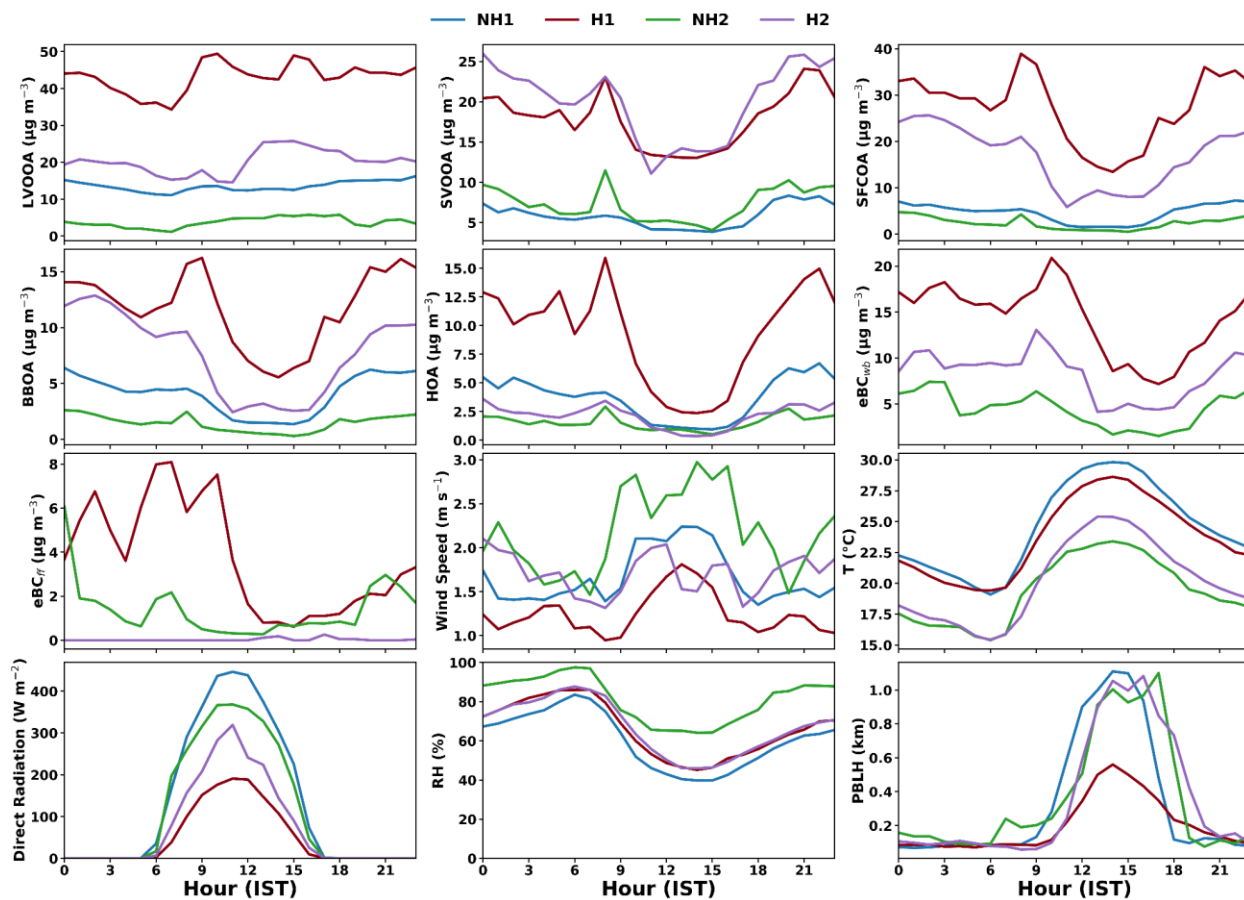48  
49

50 **Figure S7:** Diurnal variation of PMF factors: HOA, SVOOA, LVOOA, SFCOA and BBOA; 2 resolved  
 51 BC factors: eBC<sub>wb</sub> and eBC<sub>ff</sub>, meteorological parameters: Wind Speed, Temperature, Direct  
 52 Radiation, Relative Humidity, PBLH during Haze (H1 & H2) and Non-Haze (NH1& NH2) period from  
 53 25<sup>th</sup> October 2023 to 15<sup>th</sup> November 2023.

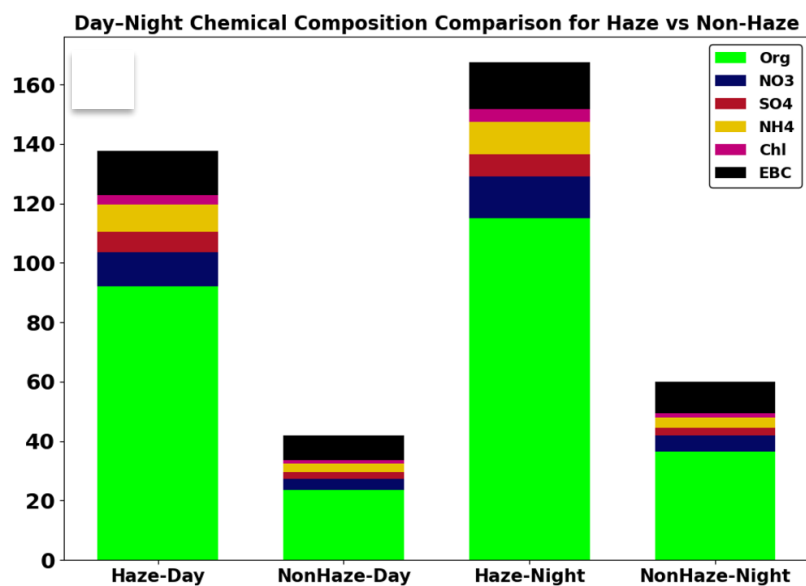

54  
 55 **Figure S8:** Daytime and nighttime  $PM_{2.5}$  chemical composition during haze and non-haze periods.  
 56 Bars represent mean contributions of organic aerosol (Org),  $NO_3^-$ ,  $SO_4^{2-}$ ,  $NH_4^+$ , chloride (Chl),  
 57 and equivalent black carbon (eBC). Data is for the full period from 25<sup>th</sup> October 2023 to 15<sup>th</sup>  
 58 November 2023.

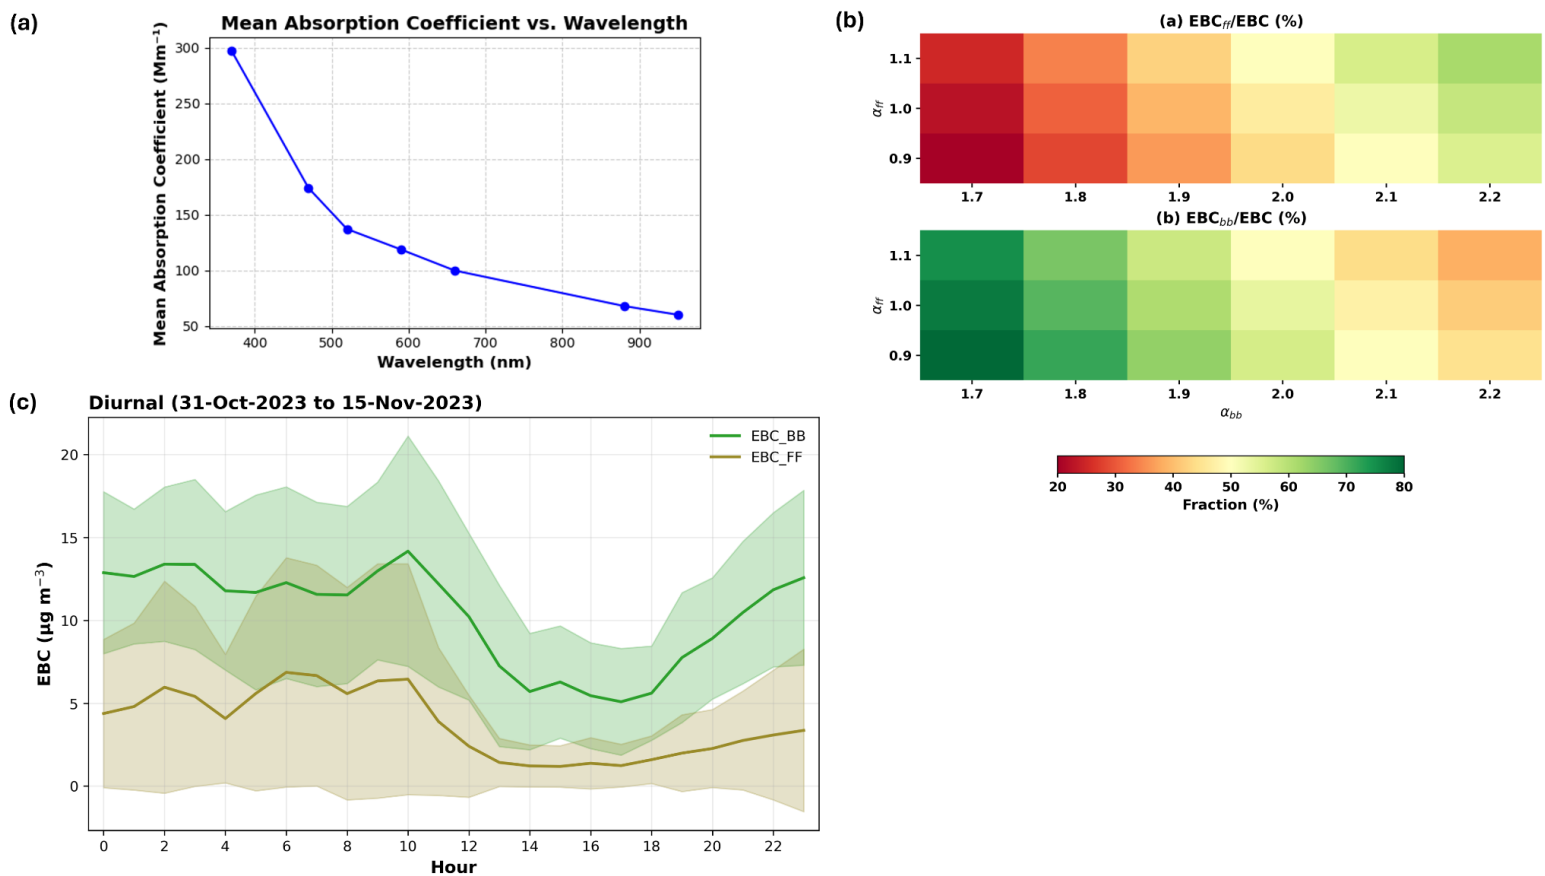

59

60 **Figure S9:** (a) Spectral variation of the mean aerosol light absorption coefficient as a function of  
 61 wavelength. We can see stronger absorption in the UV region due to woodburning emissions in  
 62 intense agricultural activity. (b) Sensitivity of fossil-fuel black carbon ( $eBC_{ff}$ ) and biomass-burning  
 63 black carbon ( $eBC_{bb}$ ) fractional contributions to assumed absorption Ångström exponents ( $\alpha_{ff}$  and  
 64  $\alpha_{bb}$ ); color shading indicates percentage contribution. (c) Mean diurnal variation of  $eBC_{wb}$  and  
 65  $eBC_{ff}$  concentrations during 31 October–15 November 2023, with shaded regions representing  
 66 variability ( $\pm 1\sigma$ ).

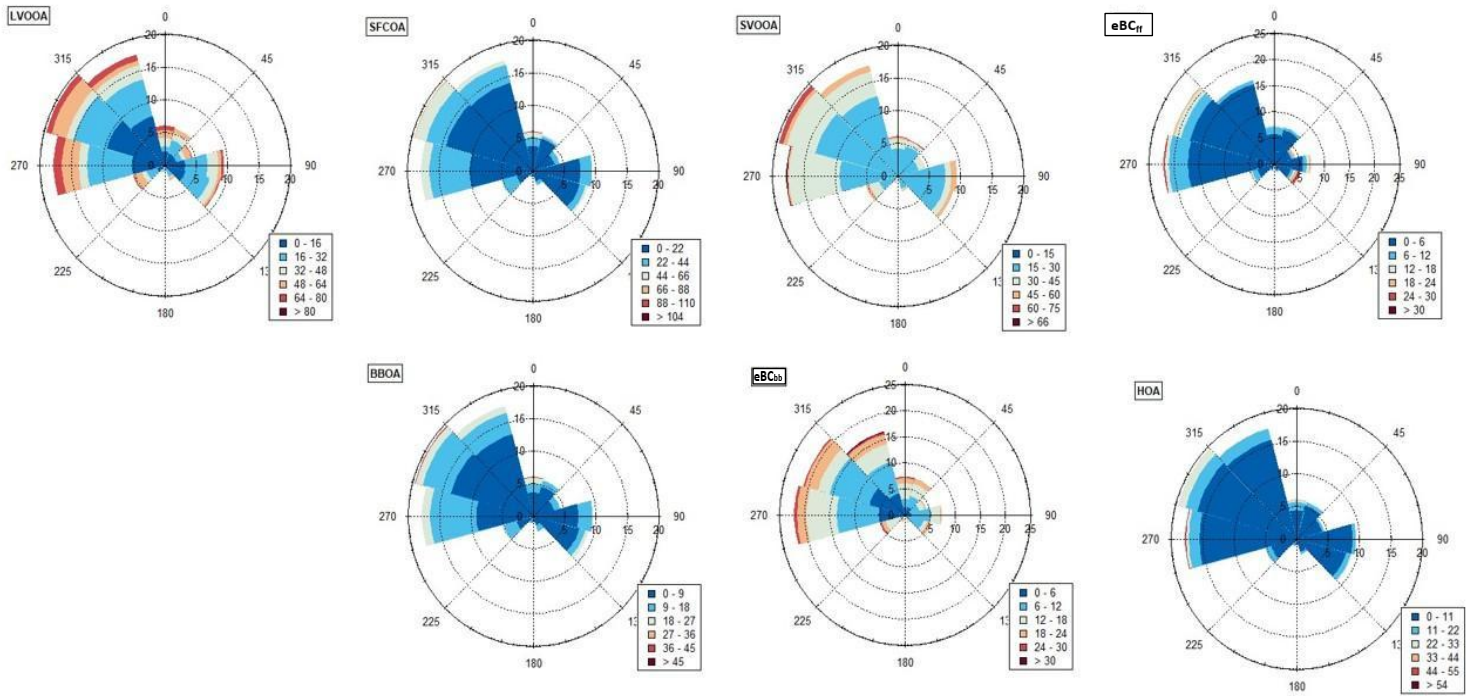

67 **Figure S10:** Pollution Rose (PR) plots for full period of data from 25<sup>th</sup> October 2023 to 15<sup>th</sup>  
 68 November 2023 for 5 resolved OA factors: HOA, SVOOA, LVOOA, SFCOA and BBOA; 2 resolved  
 69 eBC factors: eBC<sub>wb</sub> and eBC<sub>ff</sub>.

70  
71  
72  
73  
74  
75  
76  
77  
78  
79  
80  
81  
82  
83

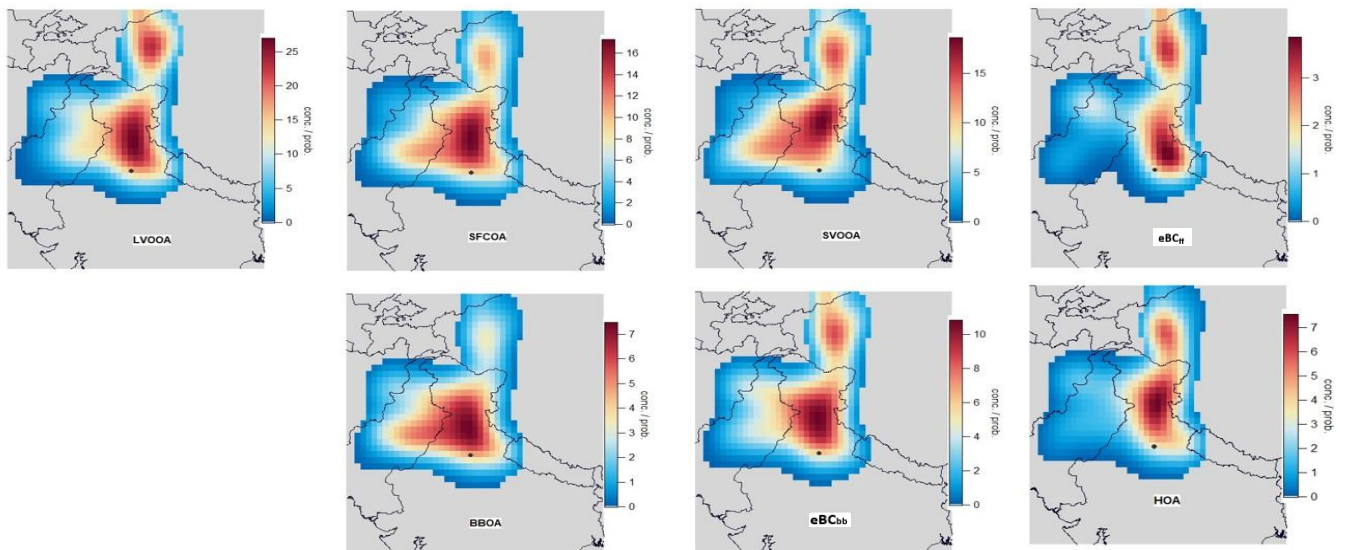

84 **Figure S11:** Concentrated Weighted Trajectory (CWT) plots calculated with Hysplit Model for  
 85 period of data acquired from 25<sup>th</sup> October 2023 to 15<sup>th</sup> November 2023 for 5 resolved OA  
 86 factors: HOA, SVOOA, LVOOA, SFCOA and BBOA; 2 resolved eBC factors: eBC<sub>wb</sub> and eBC<sub>ff</sub>.

87

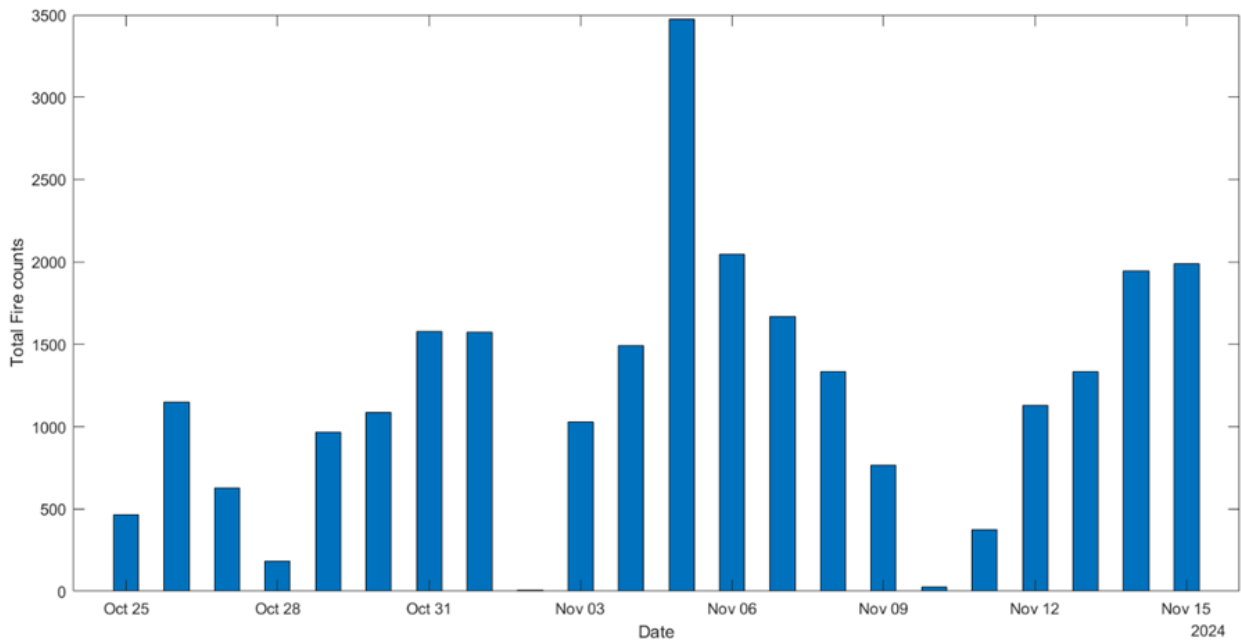

88 **Figure S12:** Time series of the total fire counts obtained from SUOMI VIIRS.

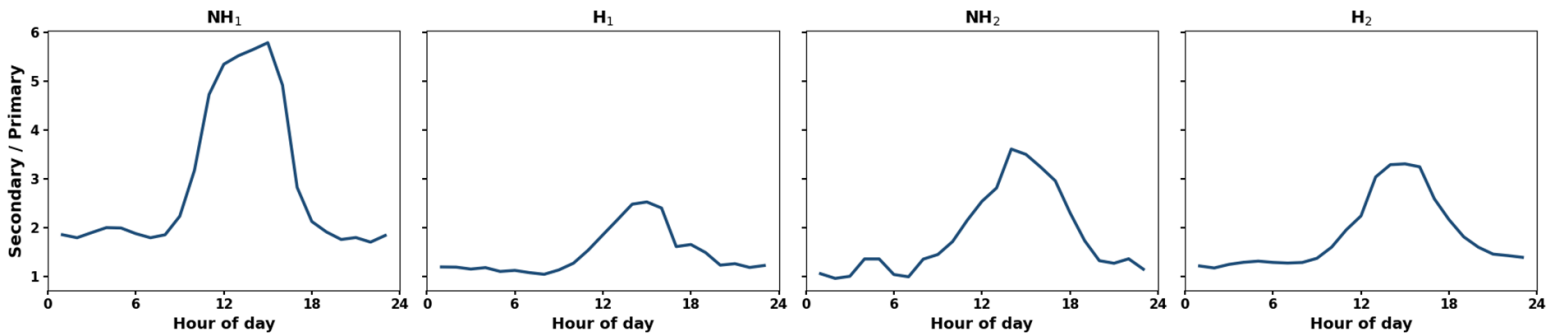

89 **Figure S13:** Diurnal variation of the secondary-to-primary aerosol ratio during non-haze (NH<sub>1</sub>,  
 90 NH<sub>2</sub>) and haze (H<sub>1</sub>, H<sub>2</sub>) periods. Higher ratios indicate enhanced secondary aerosol formation  
 91 relative to primary emissions.

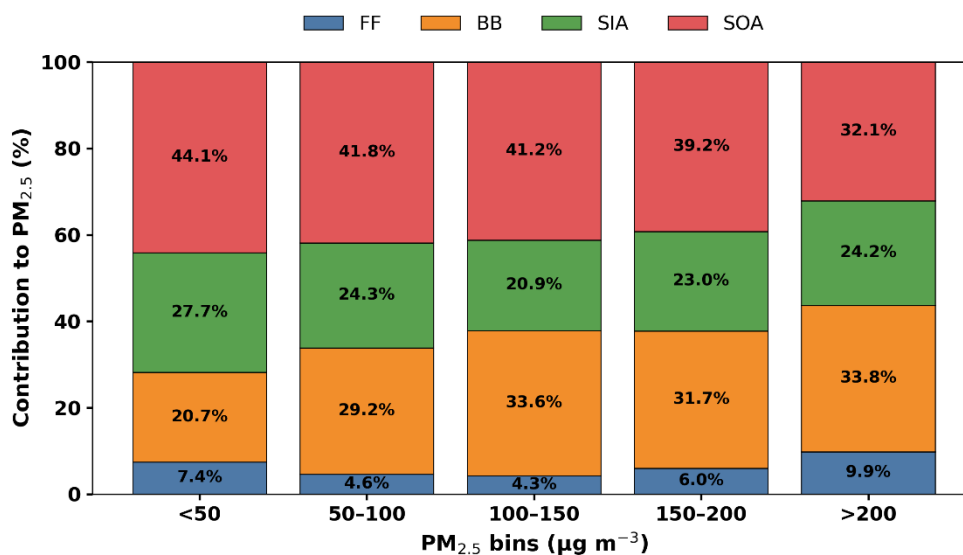

93 **Figure S14:** Variation in the chemical composition of particulate matter as a function of PM  
 94 concentration. Bars show the percentage contribution of secondary organic aerosol (SOA),  
 95 secondary inorganic aerosol (SIA), biomass-burning aerosol (BB), and fossil-fuel-related aerosol  
 96 (FF) across different PM concentration bins.

97

$$98 \text{ SOA} = \text{LVOOA} + \text{SVOOA}$$

$$99 \text{ SIA} = \text{SO}_4 + \text{NO}_3 + \text{NH}_4 + \text{Chl}$$

$$100 \text{ BB} = \text{SFCOA} + \text{BBOA} + \text{EBC}_{\text{BB}}$$

$$101 \text{ FF} = \text{HOA} + \text{EBC}_{\text{FF}}$$

102 **Table S1:** Elemental Ratio calculations(O:C, H:C and OM:OC) for 5 resolved OA factors: HOA,  
103 SVOOA, LVOOA, SFCOA and BBOA.

| Elemental Ratio | HOA  | SVOOA | LVOOA | SFCOA | BBOA |
|-----------------|------|-------|-------|-------|------|
| f43             | 0.11 | 0.07  | 0.06  | 0.15  | 0.04 |
| f44             | 0.01 | 0.21  | 0.27  | 0.05  | 0.01 |
| O:C             | 0.1  | 0.72  | 0.91  | 0.21  | 0.09 |
| H:C             | 1.19 | 1.09  | 1.04  | 1.25  | 0.96 |
| OM:OC           | 1.3  | 2.1   | 2.34  | 1.45  | 1.28 |

104

105 **Table S2:** Summary of different haze period data acquired from 25<sup>th</sup> October 2023 to 15<sup>th</sup>  
 106 November 2023 for 5 resolved OA factors: HOA, SVOOA, LVOOA, SFCOA and BBOA; 2 resolved  
 107 eBC factors: eBC<sub>wb</sub> and eBC<sub>ff</sub>. Arithmetic mean (AM), Geometric mean (GM), and Geometric  
 108 standard deviation (GSD) for hourly concentrations are calculated.  
 109

| Variable          | Arithmetic Mean |      |      |     |      | Geometric Mean (Std) |               |               |              |               |
|-------------------|-----------------|------|------|-----|------|----------------------|---------------|---------------|--------------|---------------|
|                   | Over<br>all     | NH1  | H1   | NH2 | H2   | Overall              | NH1           | H1            | NH2          | H2            |
| LVOOA             | 25              | 13.5 | 42.8 | 4.1 | 20.2 | 17.2<br>(2.7)        | 11.3<br>(2.0) | 38.2<br>(1.7) | 3.3<br>(2.1) | 19.4<br>(1.3) |
| SVOOA             | 12.8            | 5.8  | 18   | 7.3 | 20.4 | 9.6<br>(2.2)         | 5.3<br>(1.5)  | 14.0<br>(2.1) | 6.6<br>(1.6) | 19.6<br>(1.3) |
| SFCOA             | 15.1            | 4.6  | 27.5 | 2.4 | 17   | 7.0<br>(4.9)         | 2.4<br>(4.4)  | 22.4<br>(2.0) | 1.4<br>(3.4) | 15.0<br>(1.7) |
| BBOA              | 7.3             | 4    | 11.8 | 1.5 | 7.8  | 4.7<br>(2.9)         | 3.1<br>(2.2)  | 10.0<br>(1.9) | 0.9<br>(2.8) | 6.5<br>(1.9)  |
| HOA               | 5.5             | 3.6  | 9.4  | 1.5 | 2.2  | 3.3<br>(2.8)         | 2.6<br>(2.3)  | 7.1<br>(2.2)  | 1.3<br>(1.9) | 1.7<br>(2.4)  |
| eBC <sub>bb</sub> | 10.9            | ---  | 14.2 | 4.2 | 8.3  | 8.9<br>(2.0)         | ---           | 13.1<br>(1.6) | 3.4<br>(2.1) | 7.6<br>(1.5)  |
| eBC <sub>ff</sub> | 3.1             | ---  | 3.8  | 1.2 | 0.03 | 2.4<br>(4.3)         | ---           | 2.9<br>(3.9)  | 0.9<br>(3.4) | 0.2<br>(2.5)  |

111 **Table S3:** Day time and Night time summary of different haze period data acquired from 25<sup>th</sup>  
 112 October 2023 to 15<sup>th</sup> November 2023 for 5 resolved OA factors: HOA, SVOOA, LVOOA, SFCOA and  
 113 BBOA; 2 resolved eBC factors: eBC<sub>wb</sub> and eBC<sub>ff</sub>. Arithmetic mean (AM) are calculated for all the  
 114 factors.

115  
 116

| Variable          | Overall |       | NH1  |       | H1   |       | NH2 |       | H2    |       |
|-------------------|---------|-------|------|-------|------|-------|-----|-------|-------|-------|
|                   | Day     | Night | Day  | Night | Day  | Night | Day | Night | Day   | Night |
| LVOOA             | 24.1    | 25.8  | 12.8 | 14.3  | 42.9 | 42.7  | 4.3 | 3.8   | 20    | 20.3  |
| SVOOA             | 10.6    | 15.1  | 4.7  | 6.9   | 15.6 | 20.2  | 5.9 | 9.1   | 16.6  | 23.7  |
| SFCOA             | 11.8    | 18.5  | 3.1  | 6.2   | 23.4 | 31.2  | 1.4 | 3.6   | 12.2  | 21.2  |
| BBOA              | 5.5     | 9.2   | 2.7  | 5.4   | 10   | 13.5  | 0.9 | 2.2   | 5     | 10.3  |
| HOA               | 3.7     | 7.3   | 2.2  | 5.1   | 6.6  | 12    | 1.2 | 1.9   | 1.6   | 2.7   |
| eBC <sub>bb</sub> | 10      | 11.7  | --   | --    | 13.6 | 14.8  | 3.6 | 5     | 7.7   | 8.8   |
| eBC <sub>ff</sub> | 3.2     | 3     | --   | --    | 3.8  | 3.7   | 0.7 | 1.9   | 0.046 | 0.012 |

117  
 118

119 **Table S4:** Summary of different haze period data acquired from 25<sup>th</sup> October 2023 to 15<sup>th</sup>  
 120 November 2023 for Primary Aerosol(PA): (HOA + SFCOA + BBOA + eBC<sub>ff</sub>+ eBC<sub>wb</sub>) and Secondary  
 121 Aerosols(SA): (SVOOA + LVOOA + Chl<sup>-</sup> + NO<sub>3</sub><sup>-</sup> + SO<sub>4</sub><sup>2-</sup> + NH<sub>4</sub><sup>+</sup>) . Arithmetic mean (AM), Geometric  
 122 mean (GM), and Geometric standard deviation (GSD) for hourly concentrations are calculated.  
 123

| <i>Period</i> | <i>Aerosol Type</i> | <i>AM (µg/m<sup>3</sup>)</i> | <i>GM (µg/m<sup>3</sup>)</i> | <i>GSD</i>  |
|---------------|---------------------|------------------------------|------------------------------|-------------|
| <i>NH1</i>    | <i>PA</i>           | <i>12.22</i>                 | <i>8.57</i>                  | <i>2.53</i> |
| <i>NH1</i>    | <i>SA</i>           | <i>32.17</i>                 | <i>27.58</i>                 | <i>1.86</i> |
| <i>H1</i>     | <i>PA</i>           | <i>66.7</i>                  | <i>58.66</i>                 | <i>1.72</i> |
| <i>H1</i>     | <i>SA</i>           | <i>99.54</i>                 | <i>92.76</i>                 | <i>1.49</i> |
| <i>NH2</i>    | <i>PA</i>           | <i>10.71</i>                 | <i>8.91</i>                  | <i>1.91</i> |
| <i>NH2</i>    | <i>SA</i>           | <i>17.95</i>                 | <i>16.81</i>                 | <i>1.45</i> |
| <i>H2</i>     | <i>PA</i>           | <i>35.31</i>                 | <i>32.06</i>                 | <i>1.6</i>  |
| <i>H2</i>     | <i>SA</i>           | <i>61.39</i>                 | <i>60.06</i>                 | <i>1.24</i> |

124

125 **Table S5:** Percentage contribution in different haze period data acquired from 25<sup>th</sup> October 2023  
126 to 15<sup>th</sup> November 2023 for Primary Aerosol(PA): (HOA + SFCOA + BBOA + eBC<sub>ff</sub> + eBC<sub>wb</sub>) and  
127 Secondary Aerosols(SA): (SVOOA + LVOOA + Chl + NO<sub>3</sub><sup>-</sup> + SO<sub>4</sub><sup>2-</sup> + NH<sub>4</sub><sup>+</sup>).  
128

| <i>Period</i> | <i>Primary Aerosol (%)</i> | <i>Secondary Aerosol (%)</i> |
|---------------|----------------------------|------------------------------|
| <i>NH1</i>    | 27.5                       | 72.5                         |
| <i>H1</i>     | 40.1                       | 59.9                         |
| <i>NH2</i>    | 37.4                       | 62.6                         |
| <i>H2</i>     | 36.5                       | 63.5                         |

129
